# Supplementary material for: Nanotechnological approaches in the treatment of schistosomiasis: an overview
Source: publisher site journal article supplement (doi:10.3762/bjnano.15.2), 2024-01-03
Supplement: Additional file 1 [file 2190-4286-15-2-S1.pdf]

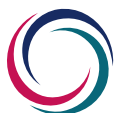

## Supporting Information

for

### **Nanotechnological approaches in the treatment of schistosomiasis: an overview**

Lucas Carvalho, Michelle Sarcinelli and Beatriz Patrício

*Beilstein J. Nanotechnol.* **2024**, *15*, 13–25. [doi:10.3762/bjnano.15.2](https://doi.org/10.3762/bjnano.15.2)

### **Nanosystems with their encapsulated drugs found in open access articles**

**Table S1:** Nanosystems with their encapsulated drugs found in open access articles.

| <b>Nanosystem</b>                | <b>Encapsulated drug</b> | <b>References</b>                                                                                                                                                                 |
|----------------------------------|--------------------------|-----------------------------------------------------------------------------------------------------------------------------------------------------------------------------------|
| <b>Liposome</b>                  | Praziquantel             | Mourão et al. 2005 [1]; Frezza et al. 2007 [2]; Frezza et al. 2013 [3]; Frezza et al. 2015 [4]; Labib El Gendy et al. 2019 [5]; Adekiya et al 2022a [6];                          |
|                                  | Epiisopiloturine         | Guimarães et al. 2014 [7];                                                                                                                                                        |
|                                  | Sulfated Alpha-D-glucan  | Araújo et al. 2011 [8]                                                                                                                                                            |
|                                  | Tartar emetic            | De Melo et al. 2003 [9]                                                                                                                                                           |
|                                  | Oxamniquine              | Frézard et al 1997 [10]                                                                                                                                                           |
| <b>Polymeric nanoparticles</b>   | Praziquantel             | Malhado et al. 2016 [11]; Paulino et al. 2022 [12]; Fonseca et al. 2013 [13]; Sadek et al. 2018 [14]; Mainardes et al. 2006 [15]; AboSheishaa et al 2019 [16].                    |
|                                  | Thymoquinone             | El-Menyawy et al. 2021 [17]; El-Menyawy et al 2022 [18].                                                                                                                          |
|                                  | Oleic acid               | Oliveira et al. 2021 [19]                                                                                                                                                         |
|                                  | Bee venom                | Badr et al. 2022 [20]                                                                                                                                                             |
|                                  | Curcumin                 | Luz et al. 2012 [21]                                                                                                                                                              |
|                                  | <i>N. sativa</i> extract | Elawamy et al 2019 [22];                                                                                                                                                          |
|                                  | Licarin-A                | Lima et al. 2022 [23];                                                                                                                                                            |
|                                  | Spirolactone             | Abd El Hady et al 2023 [24];                                                                                                                                                      |
| Lignan-DNHK                      | Lima et al. 2017 [25]    |                                                                                                                                                                                   |
| <b>Solid-lipid nanoparticles</b> | Praziquantel             | Radwan et al. 2019 [26]; de Souza et al. 2014 [27] ; Xie et al. 2010 [28]; Yang et al. 2009 [29]; AL-Noshokaty et al. 2020 [30]; Adekiya et al 2022b [31]; Mishra et al 2014 [32] |
|                                  | Celecoxibe               | Ibrahim et al. 2022 [33];                                                                                                                                                         |
|                                  | Praziquantel             | Eissa et al. 2020 [34]; Amara et al. 2018 [35];                                                                                                                                   |

|                                      |                  |                                                                                                                                                                                                                                                                                             |
|--------------------------------------|------------------|---------------------------------------------------------------------------------------------------------------------------------------------------------------------------------------------------------------------------------------------------------------------------------------------|
| <b>Lipid nanocapsules</b>            | Milfetosine      | Eissa et al 2020 [34]; Eissa et al. 2015 [36]; El-Molesmany et al. 2016 [37];                                                                                                                                                                                                               |
| <b>Nanostructured lipid carriers</b> | Praziquantel     | Kolenyak-Santos et al. 2015 [38]                                                                                                                                                                                                                                                            |
| <b>Niosomes</b>                      | Praziquantel     | Zoghroban et al. 2019 [39]; Amer et al. 2022b [40]                                                                                                                                                                                                                                          |
|                                      | Ubiquinol        | Amer et al. 2022a [41]                                                                                                                                                                                                                                                                      |
| <b>Nanosuspension</b>                | Praziquantel     | Gonzalez et al. 2019 [42]                                                                                                                                                                                                                                                                   |
| <b>Nanoemulsion</b>                  | Praziquantel     | Cong et al. 2017 [43]                                                                                                                                                                                                                                                                       |
|                                      | Epiisopiloturine | Lima et al. 2018 [44]                                                                                                                                                                                                                                                                       |
|                                      | BphEA            | Araújo et al. 2007 [45]                                                                                                                                                                                                                                                                     |
|                                      | Curcuma extract  | Aly et al. 2017 [46]                                                                                                                                                                                                                                                                        |
|                                      | Carvacrol        | Xavier et al. 2022 [47]                                                                                                                                                                                                                                                                     |
| <b>Nanocomposite</b>                 | Praziquantel     | El-Feky et al. 2015 [48]                                                                                                                                                                                                                                                                    |
|                                      | None             | Bayaumy et al. 2016 [49]; Darwish et al. 2018 [50]                                                                                                                                                                                                                                          |
| <b>Nanocrystal</b>                   | Praziquantel     | Yang et al. 2019 [51]                                                                                                                                                                                                                                                                       |
| <b>Inorganic nanoparticles</b>       | Praziquantel     | Tawfeek et al. 2019 [52]; Mokbel et al. 2020 [53]                                                                                                                                                                                                                                           |
|                                      | Curcumin         | Mokbel et al. 2020 [53]                                                                                                                                                                                                                                                                     |
|                                      | None             | Abou El-Nour et al. 2021 [54]; Dkhil et al. 2019 [55]; Dkhil et al 2015b [56]; Dkhil et al. 2017 [57]; Dkhil et al. 2016a [58]; Dkhil et al. 2016b [59]; Moustafa et al. 2018 [60]; Bauomy et al. 2020 [61]; El-Shorbagy et al. 2019 [62]; Khalil et al. 2018 [63]; Dkhil et al. 2015a [64] |
| <b>Others</b>                        | Ginger extract   | Abd El Wahab et al. 2021 [65]                                                                                                                                                                                                                                                               |

## References

- [1] Mourão, S. C., Costa, P. I., Salgado, H. R., Gremião, M. P. D. *International journal of pharmaceutics* **2005**, 295, 157-162. doi:10.1016/j.ijpharm.2005.02.009
- [2] Frezza, T. F., Madi, R. R., Banin, T. M., Pinto, M. C., Souza, A. L. R., Gremião, M. P. D., Allegretti, S. M. *Revista de Ciências Farmacêuticas Básica e Aplicada* **2007**, 209-214.
- [3] Frezza, T. F., Gremião, M. P. D., Zanotti-Magalhães, E. M., Magalhães, L. A., de Souza, A. L. R., Allegretti, S. M. *Acta tropica* **2013**, 128, 70-75. doi:10.1016/j.actatropica.2013.06.011
- [4] Frezza, T. F., de Souza, A. L. R., Prado, C. C. R., de Oliveira, C. N. F., Gremião, M. P. D., Giorgio, S., Dolder, M. A. H., Joazeiro, P. P., Allegretti, S. M. *Acta tropica* **2015**, 150, 182-189. doi:10.1016/j.actatropica.2015.07.022
- [5] Labib El Gendy, A. E. M., Mohammed, F. A., Abdel-Rahman, S. A., Shalaby, T. I. A., Fathy, G. M., Mohammad, S. M., El-Shafey, M., Mohammed, N. A. *Journal of Parasitic Diseases* **2019**, 43, 416-425. doi:10.1007/s12639-019-01106-6
- [6] Arunachalam, A., Jeganath, S., Yamini, K., Tharangini, K. *International journal of novel trends in pharmaceutical sciences* **2012**, 2, 25-31.
- [7] Guimarães, M. A., Campelo, Y. D., Veras, L., Colhone, M. C., Lima, D. F., Ciancaglini, P., Kuckelhaus, S. S., Lima, F. C. A., de Moraes, J., de Leite, J. R. S. A. *Journal of nanoscience and nanotechnology* **2014**, 14, 4519-4528. doi:10.1166/jnn.2014.8248
- [8] Araújo, R. V. S., Melo-Júnior, M. R., Beltrão, E. I. C., Mello, L. A., Iacomini, M., Carneiro-Leão, A. M. A., Carvalho Jr, L. B., Santos Magalhães, N. S. *Brazilian Journal of Medical and Biological Research* **2011**, 44, 311-318. doi:10.1590/s0100-879x2011007500014
- [9] de Melo, A. L., Silva-Barcellos, N. M., Demicheli, C., Frézard, F. *International journal of pharmaceutics* **2003**, 255, 227-230. doi:10.1016/s0378-5173(03)00125-x
- [10] Frézard, F., Melo, A. L. D. *Revista do Instituto de Medicina Tropical de São Paulo* **1997**, 39, 97-100. doi:10.1590/S0036-46651997000200006

- [11] Malhado, M., Pinto, D. P., Silva, A. C., Silveira, G. P., Pereira, H. M., Santos Jr, J. G., Guillarducci-Ferraz, C. V. V., Viçosa, A. L., Nele, M., Fonseca, L. B., Pinto, J. C. C. S., Calil-Elias, S. *Journal of pharmaceutical and biomedical analysis* **2016**, 117, 405-412. doi:10.1016/j.jpba.2015.09.023
- [12] Paulino, É. T., Ribeiro de Lima, M., Viçosa, A. L., Silva, C. H. D., Salomon, C. J., Real, D. A., Leonardi, D., Silva, C. C. M., Moraes Neto, A. H. A. D. *Frontiers in Public Health* **2022**, 10, 848633. doi:10.3389/fpubh.2022.848633
- [13] Fonseca, L. B., Viçosa, A. L., Mattos, A. C. A., Coelho, P. M. Z., Araújo, N., Zamith, H. D. S., Volpato, N. M., Nele, M., Pinto, J. C. C. S. *Vigil Sanitária Debate*, **2013**; 1, 82-88. doi:10.3395/vd.v1i4.111en
- [14] Sadek, G. S., Harba, N., ELREFAI, S. A., SHARAF EL-DEEN, S. A., SALEH, M. M. *Journal of the Egyptian Society of Parasitology* **2018**, 48, 629-638.
- [15] Mainardes, R. M., Chaud, M. V., Gremião, M. P. D., Evangelista, R. C. *Journal of nanoscience and nanotechnology* **2006**, 6, 3057-3061. doi:10.1166/jnn.2006.487
- [16] AboSheishaa, G. A. *Egyptian Veterinary Medical Society of Parasitology Journal (EVMSPJ)* **2019**, 15, 149-162. doi:10.21608/evmspj.2019.145815
- [17] El-Menyawy, H. M., Metwally, K. M., Aly, I. R., Abo Elqasem, A. A., Youssef, A. A. *The Egyptian Journal of Hospital Medicine* **2021**, 84, 1818-1826. doi:10.21608/EJHM.2021.177604
- [18] El-Menyawy Et Al, H. M. *Egyptian Journal of Aquatic Biology and Fisheries* **2022**, 26, 1375-1392. doi:10.21608/EJABF.2022.268786
- [19] de Oliveira, R. N., Campos, P. M., Pinto, R. M. C., Mioduski, J., Santos, R. D., Justus, B., de Paula, J. F. P., Klein, T., Boscardin, P. M. D., Corrêa, S. A. P., Allegretti, S. M., Ferrari, P. C. *Journal of Drug Delivery Science and Technology* **2021**, 63, 102429. doi:10.1016/j.jddst.2021.102429
- [20] Badr, A. M., Saleh, A. H., Mahmoud, S. S., Mousa, M. R., Mahana, N. A., Dena, A. S. A. *Journal of Drug Delivery Science and Technology* **2022**, 71, 103344. doi:10.1016/j.jddst.2022.103344
- [21] Luz, P. P., Magalhães, L. G., Pereira, A. C., Cunha, W. R., Rodrigues, V., Andrade e Silva, M. L. *Parasitology research* **2012**, 110, 593-598. doi:10.1007/s00436-011-2527-9

- [22] Elawamy, W. E., Mohram, A. F., Naguib, M. M., Ali, H. S., Kishik, S. M., Hendawi, F. F. *Journal of Medicinal Plants Research* **2019**, 13, 443-451. doi:10.5897/JMPR2019.6842
- [23] Lima, T. C., Magalhães, L. G., Paula, L. A. D. L., Cunha, W. R., Januário, A. H., Pauletti, P. M., Bastos, J. K., Mnuquian, H. A., Forim, M. R., Morais-Urano, R. P., Laurentiz, R. S., Tondato, W. N., Molina, E. F., Santos, M. F. C., e Silva, M. L. *Experimental Parasitology* **2022**, 241, 108357. doi:10.1016/j.exppara.2022.108357
- [24] Abd El Hady, W. E., El-Emam, G. A., Saleh, N. E., Hamouda, M. M., Motawea, A. *International journal of nanomedicine* **2023**, 18, 987–1005. doi:10.2147/IJN.S389449
- [25] Lima, T. C., Lucarini, R., Luz, P. P., de Faria, E. H., Marçal, L., Magalhães, L. G., Badoco, F. R., Esperandim, V. R., Molina, E. F., Laurentz, R. S., Lima, R. G., Cunha, W. R., Bastos, J. K., Silva, M. L. A. *Pharmaceutical biology* **2017**, 55, 2270-2276. doi:10.1080/13880209.2017.1405996
- [26] Radwan, A., El-Lakkany, N. M., William, S., El-Feky, G. S., Al-Shorbagy, M. Y., Saleh, S., Botros, S. *Parasites & vectors* **2019**, 12, 1-12. doi:10.1186/s13071-019-3563-z
- [27] de Souza, A. L. R., Andreani, T., de Oliveira, R. N., Kiill, C. P., dos Santos, F. K., Allegretti, S. M., Chaud, M. V., Souto, E. B., Silva, A. M., Gremião, M. P. D. *International journal of pharmaceutics* **2014**, 463, 31-37. doi:10.1016/j.ijpharm.2013.12.022
- [28] Xie, S., Pan, B., Wang, M., Zhu, L., Wang, F., Dong, Z., Wang, X., Zhou, W. = *Nanomedicine* **2010**, 5, 693-701. doi:10.2217/nm.10.42
- [29] Yang, L., Geng, Y., Li, H., Zhang, Y., You, J., Chang, Y. *Die Pharmazie-An International Journal of Pharmaceutical Sciences* **2009**, 64, 86-89.
- [30] AL-Noshokaty, T. M., Aly, I., Abo-Elmatty, D. M., Mesbah, N. M., Shehata, A. S., Etewa, S. *Res J Parasitol* **2020**; 15: 38-46.
- [31] Adekiya, T. A., Kumar, P., Kondiah, P. P., Ubanako, P., Choonara, Y. E. *International Journal of Molecular Sciences* **2022b**, 23, 9485. doi:10.3390/ijms23169485
- [32] Mishra, A., Vuddanda, P. R., Singh, S. *Journal of nanotechnology*, **2014**. doi:10.1155/2014/351693

- [33] Ibrahim, E. I., Abou-El-Naga, I. F., El-Temshahy, M. M., Elsayy, E. S. A., Makled, S., Mogahed, N. M. F. H. *Acta Tropica* **2022**, 229, 106342. doi:10.1016/j.actatropica.2022.106342
- [34] Eissa, M. M., El-Azzouni, M. Z., El-Khordagui, L. K., Abdel Bary, A., El-Moslemany, R. M., Abdel Salam, S. A. *Parasites & Vectors* **2020**, 13, 1-12. doi:10.1186/s13071-020-04346-1
- [35] Amara, R. O., Ramadan, A. A., El-Moslemany, R. M., Eissa, M. M., El-Azzouni, M. Z., El-Khordagui, L. K. *International journal of nanomedicine* **2018**, 13, 4493. doi:10.2147/IJN.S167285
- [36] Eissa, M. M., El-Moslemany, R. M., Ramadan, A. A., Amer, E. I., El-Azzouni, M. Z., El-Khordagui, L. K. *PloS one* **2015**, 10, e0141788. doi:10.1371/journal.pone.0141788
- [37] El-Moslemany, R. M., Eissa, M. M., Ramadan, A. A., El-Khordagui, L. K., El-Azzouni, M. Z. *Acta tropica* **2016**, 159, 142-148. doi:10.1016/j.actatropica.2016.03.038
- [38] Kolenyak-Santos, F., Garnero, C., De Oliveira, R. N., De Souza, A. L., Chorilli, M., Allegretti, S. M., Longhi, M. R., Chaud, M. V., Gremião, M. P. *Journal of Nanoscience and Nanotechnology* **2015**, 15, 761-772. doi:10.1166/jnn.2015.9186
- [39] Zoghroban, H. S., El-Kowrany, S. I., Aboul Asaad, I. A., El Maghraby, G. M., El-Nouby, K. A., Abd Elazeem, M. A. *Parasitology research* **2019**, 118, 219–234. doi:10.1007/s00436-018-6132-z
- [40] Amer, E. I., Abou-El-Naga, I. F., Boulos, L. M., Ramadan, H. S., Younis, S. S. *Biomedica: revista del Instituto Nacional de Salud* **2022b**, 42, 67–84. doi:10.7705/biomedica.5913
- [41] Amer, E. I., El-Azzouni, M. Z., El-Bannan, R. T., Shalaby, T. I., El-Achy, S. N., Gomaa, M. M. *Acta Tropica* **2022a**, 226, 106231. doi:10.1016/j.actatropica.2021.106231
- [42] Gonzalez, M. A., Ramírez Rigo, M. V., González Vidal, N. L. *AAPS PharmSciTech* **2019**, 20, 1-12. doi:10.1208/s12249-019-1548-z
- [43] Cong, Z., Shi, Y., Peng, X., Wei, B., Wang, Y., Li, J., Li, J., Li, J. *Drug Development and Industrial Pharmacy* **2017**, 43, 558-573. doi:10.1080/03639045.2016.1270960

- [44] Lima, L. I., Py-Daniel, K. R., Guimarães, M. A., Muehlmann, L. A., Mafud, A. C., Mascarenhas, Y. P., de Moraes, J., Leite, J. R. S. A., Jiang, C-S., Azevedo, R. B., Figueiro Longo, J. P. *Nanomedicine* **2018**, 13, 689-702. doi:10.2217/nnm-2017-0308
- [45] Araújo, S. C., de Mattos, A. C. A., Teixeira, H. F., Coelho, P. M. Z., Nelson, D. L., de Oliveira, M. C. *International Journal of Pharmaceutics* **2007**, 337, 307-315. doi:10.1016/j.ijpharm.2007.01.009
- [46] Aly, N., Hussein, A., Emam, H., Rashed, G. *Parasitologists United Journal* **2017**, 10, 44-51. doi:10.21608/PUJ.2017.4736
- [47] Xavier, E. S., De Souza, R. L., Rodrigues, V. C., Melo, C. O., Roquini, D. B., Lemes, B. L., Wilairatana, P., Oliveira, E. E., de Moraes, J. *Frontiers in Pharmacology* **2022**, 13. doi:10.3389/fphar.2022.917363
- [48] El-Feky, G. S., Mohamed, W. S., Nasr, H. E., El-Lakkany, N. M., Seif el-Din, S. H., Botros, S. S. *Antimicrobial Agents and Chemotherapy* **2015**, 59, 3501-3508. doi:10.1128/AAC.04875-14
- [49] Bayaomy, F. E., Darwish, A. S. *Materials Science and Engineering: C* **2016**, 59, 717-730. doi:10.1016/j.msec.2015.10.074
- [50] Darwish, A. S., Bayaomy, F. E., Ismail, H. M. *Materials Science and Engineering: C* **2018**, 93, 996-1011. doi:10.1016/j.msec.2018.09.007
- [51] Yang, R., Zhang, T., Yu, J., Liu, Y., Wang, Y., He, Z. *Asian journal of pharmaceutical sciences* **2019**, 14, 321-328. doi:10.1016/j.ajps.2018.06.001
- [52] Tawfeek, G. M., Baki, M. H. A., Ibrahim, A. N., Mostafa, M. A. H., Fathy, M. M., Diab, M. S. E. D. M. *Parasitology research*. **2019**; 118, 3519-3533. doi:10.1016/j.ajps.2018.06.001
- [53] Mokbel, K. E. D. M., Baiuomy, I. R., Sabry, A. E. H. A., Mohammed, M. M., El-Dardiry, M. A. *Scientific reports* **2020**, 10, 1-9. doi:10.1038/s41598-020-72901-y
- [54] Abou El-Nour, M. F., Kenawy, S. H., El-Bassyouni, G. T., Hamzawy, E. M. A. *Advanced Pharmaceutical Bulletin* **2021**, 11, 68. doi:10.34172/apb.2021.004
- [55] Dkhil, M. A., Khalil, M. F., Diab, M. S., Bauomy, A. A., Santourlidis, S., Al-Shaebi, E. M., Al-Quraishy, S. *Saudi Journal of Biological Sciences* **2019**, 26, 1468-1472. doi:10.1016/j.sjbs.2018.02.008



- [56] Dkhil, M. A., Bauomy, A. A., Diab, M. S., Wahab, R., Delic, D., Al-Quraishy, S. *Parasitology research* **2015b**, 114, 3711-3719. doi:10.1007/s00436-015-4600-2
- [57] Dkhil, M. A., Khalil, M. F., Diab, M. S., Bauomy, A. A., Al-Quraishy, S. *Saudi Journal of Biological Sciences* **2017** 24, 1418-1423. doi:10.1016/j.sjbs.2016.12.017
- [58] Dkhil, M. A., Bauomy, A. A., Diab, M. S., Al-Quraishy, S. *Biomed Res* **2016a**, 27, 214-219. doi:10.3967/bes2016.104
- [59] Dkhil, M. A., Khalil, M. F., Bauomy, A. A., Diab, M. S., Al-Qura, S. *Biomedical and environmental sciences* **2016b**, 29, 773-781.
- [60] Moustafa, M. A., Mossalem, H. S., Sarhan, R. M., Abdel-Rahman, A. A., Hassan, E. M. *Parasitology research* **2018**, 117, 3867-3880. doi:10.1007/s00436-018-6093-2
- [61] Bauomy, A. A. *Environmental Science and Pollution Research* **2020**, 27, 18699-18707. doi:10.1007/s11356-020-08356-5
- [62] El-Shorbagy, A., Gamil, I. S., Mohey, M. A., Nady, S. *Nanomedicine Journal* **2019**, 6. doi:10.22038/NMJ.2019.06.003
- [63] Khalil, L. M., Azzam, A. M., Mohamed, H. A., Nigm, A. H., Taha, H. A., Soliman, M. I. *Journal of the Egyptian Society of Parasitology* **2018**, 48, 363-368. doi:10.12816/0050443
- [64] Dkhil, M. A., Bauomy, A. A., Diab, M. S., Al-Quraishy, S. *International journal of nanomedicine* **2015a** 10, 7467. doi:10.2147/IJN.S97622
- [65] Abd El Wahab, W. M., El-Badry, A. A., Mahmoud, S. S., El-Badry, Y. A., El-Badry, M. A., Hamdy, D. A. *PLoS Neglected Tropical Diseases* **2021**, 15, e0009423. doi:10.1371/journal.pntd.0009423
